# Supplementary material for: Ethnic variation in unexplained deaths in infancy, including sudden infant death syndrome (SIDS), England and Wales 2006–2012: national birth cohort study using routine data
Source: PubMed Central journal article supplement (PMC6161655; doi:10.1136/jech-2018-210453), 2018-07-04
Supplement: jech-2018-210453supp001.pdf [file jech-2018-210453supp001.pdf]

**Supplementary Table S1. Distributions of covariates by ethnic group.** Live singleton births at 22+ weeks, England and Wales 2006-2012.

| <b>Ethnic group</b>      | White British | White Non-British | Pakistani | Indian  | Bangladeshi | Black African | Mixed Black-African-White | Black Caribbean | Mixed Black-Carib-White | Other / Unspecific | Unstated |
|--------------------------|---------------|-------------------|-----------|---------|-------------|---------------|---------------------------|-----------------|-------------------------|--------------------|----------|
| <b>% of births</b>       |               |                   |           |         |             |               |                           |                 |                         |                    |          |
| <b>Parent mar/reg</b>    |               |                   |           |         |             |               |                           |                 |                         |                    |          |
| Within Marriage          | 46.2          | 64.8              | 95.7      | 96.2    | 94.6        | 61.3          | 45.7                      | 26.5            | 20.9                    | 68.3               | 57.1     |
| Joint, same addr.        | 36.7          | 26.8              | 1.9       | 2.1     | 2.7         | 14.5          | 26.3                      | 21.7            | 33.6                    | 16.5               | 28.5     |
| Joint, diff. addr.       | 10.9          | 4.0               | 1.1       | 0.9     | 1.6         | 12.4          | 15.8                      | 32.0            | 28.3                    | 8.5                | 8.3      |
| Sole registration        | 6.2           | 4.4               | 1.3       | 0.9     | 1.2         | 11.8          | 12.3                      | 19.8            | 17.2                    | 6.7                | 6.1      |
| <b>Mother COB</b>        |               |                   |           |         |             |               |                           |                 |                         |                    |          |
| Non-UK                   | 3.9           | 80.1              | 62.9      | 66.0    | 78.2        | 92.7          | 45.2                      | 36.7            | 9.4                     | 67.6               | 26.4     |
| UK                       | 96.1          | 19.9              | 37.1      | 34.0    | 21.8        | 7.3           | 54.8                      | 63.3            | 90.6                    | 32.4               | 73.6     |
| <b>Deprivation, IMD</b>  |               |                   |           |         |             |               |                           |                 |                         |                    |          |
| 1 = Advantaged           | 18.0          | 14.0              | 3.4       | 11.4    | 2.3         | 3.0           | 9.3                       | 2.4             | 8.2                     | 10.6               | 16.2     |
| 2                        | 18.9          | 16.2              | 5.4       | 13.6    | 4.3         | 5.4           | 12.4                      | 4.8             | 11.1                    | 12.7               | 18.6     |
| 3                        | 19.5          | 20.0              | 10.8      | 20.8    | 8.8         | 11.9          | 17.3                      | 13.0            | 15.8                    | 17.4               | 20.1     |
| 4                        | 20.2          | 26.1              | 25.1      | 29.9    | 24.8        | 29.6          | 26.1                      | 29.9            | 25.4                    | 25.9               | 23.1     |
| 5 = Disadvantaged        | 23.4          | 23.7              | 55.3      | 24.3    | 59.8        | 50.1          | 34.9                      | 49.8            | 39.4                    | 33.4               | 22.0     |
| <b>Gestation, weeks</b>  |               |                   |           |         |             |               |                           |                 |                         |                    |          |
| 37+                      | 94.5          | 95.4              | 94.0      | 94.0    | 93.7        | 93.8          | 94.5                      | 91.8            | 93.6                    | 94.5               | 94.4     |
| 32-36                    | 4.7           | 4.0               | 5.0       | 5.1     | 5.5         | 4.6           | 4.5                       | 6.2             | 5.3                     | 4.6                | 4.7      |
| 22-31                    | 0.8           | 0.6               | 1.0       | 0.9     | 0.8         | 1.6           | 1.0                       | 2.0             | 1.1                     | 0.9                | 0.9      |
| <b>Mother age, years</b> |               |                   |           |         |             |               |                           |                 |                         |                    |          |
| 30+                      | 47.1          | 52.7              | 37.5      | 50.5    | 35.3        | 54.3          | 45.9                      | 43.6            | 34.9                    | 51.1               | 49.7     |
| 25-29                    | 25.8          | 29.7              | 37.6      | 36.6    | 37.0        | 29.3          | 27.7                      | 25.6            | 25.3                    | 27.8               | 26.5     |
| 20-24                    | 20.0          | 15.0              | 22.9      | 12.2    | 25.5        | 13.9          | 20.4                      | 22.3            | 27.6                    | 16.9               | 18.0     |
| <20                      | 7.1           | 2.6               | 2.0       | 0.7     | 2.2         | 2.6           | 6.0                       | 8.5             | 12.3                    | 4.2                | 5.8      |
| <b>Sex</b>               |               |                   |           |         |             |               |                           |                 |                         |                    |          |
| Girl                     | 48.7          | 48.5              | 49.0      | 48.7    | 49.3        | 49.4          | 48.8                      | 49.2            | 48.8                    | 48.6               | 48.6     |
| Boy                      | 51.3          | 51.5              | 51.0      | 51.3    | 50.7        | 50.6          | 51.2                      | 50.8            | 51.2                    | 51.4               | 51.4     |
| <b>Total</b>             | 100           | 100               | 100       | 100     | 100         | 100           | 100                       | 100             | 100                     | 100                | 100      |
| <b>Number of births</b>  | 3,009,144     | 340,515           | 180,265   | 132,646 | 62,944      | 154,071       | 29,313                    | 47,503          | 46,445                  | 344,186            | 287,732  |

Parent mar/reg, parents' marital/registration status; COB, country of birth; Gestation, gestational age at birth.

Data for Figure 1 in 'Ethnic variation in unexplained deaths in infancy, including sudden infant death syndrome (SIDS), England and Wales 2006-2012: national birth cohort study using routine data'.

**Supplementary Table S2. Unexplained death in infancy by recorded cause. Deaths by age at death (completed months). Deaths per 1000 live singleton births by year of birth.** Live singleton births at 22+ weeks, England and Wales 2006-2012.

| <b>Recorded cause</b>        |                  | <b>Sudden Infant Death Syndrome</b> |                  |                 | <b>Unascertained</b> |  |
|------------------------------|------------------|-------------------------------------|------------------|-----------------|----------------------|--|
| <b>Age at death (months)</b> | <b>N deaths</b>  | <b>N deaths</b>                     | <b>%</b>         | <b>N deaths</b> | <b>%</b>             |  |
| 0                            | 274              | 162                                 | 59.1%            | 112             | 40.9%                |  |
| 1                            | 430              | 290                                 | 67.4%            | 140             | 32.6%                |  |
| 2                            | 302              | 222                                 | 73.5%            | 80              | 26.5%                |  |
| 3                            | 175              | 129                                 | 73.7%            | 46              | 26.3%                |  |
| 4                            | 126              | 88                                  | 69.8%            | 38              | 30.2%                |  |
| 5                            | 83               | 60                                  | 72.3%            | 23              | 27.7%                |  |
| 6                            | 51               | 33                                  | 64.7%            | 18              | 35.3%                |  |
| 7                            | 37               | 26                                  | 70.3%            | 11              | 29.7%                |  |
| 8                            | 36               | 24                                  | 66.7%            | 12              | 33.3%                |  |
| 9                            | 19               | 11                                  | 57.9%            | 8               | 42.1%                |  |
| 10 or 11                     | 26               | 17                                  | 65.4%            | 9               | 34.6%                |  |
| <b>Total</b>                 | <b>1,559</b>     | <b>1,062</b>                        | <b>68.1%</b>     | <b>497</b>      | <b>31.9%</b>         |  |
| <b>Year of birth</b>         | <b>N births</b>  | <b>N deaths</b>                     | <b>Rate/1000</b> | <b>N deaths</b> | <b>Rate/1000</b>     |  |
| 2006                         | 631,676          | 159                                 | 0.2517           | 72              | 0.1140               |  |
| 2007                         | 646,862          | 179                                 | 0.2767           | 70              | 0.1082               |  |
| 2008                         | 663,899          | 158                                 | 0.2380           | 78              | 0.1175               |  |
| 2009                         | 659,783          | 152                                 | 0.2304           | 78              | 0.1182               |  |
| 2010                         | 671,249          | 129                                 | 0.1922           | 77              | 0.1147               |  |
| 2011                         | 675,057          | 141                                 | 0.2089           | 68              | 0.1007               |  |
| 2012                         | 686,238          | 144                                 | 0.2098           | 54              | 0.0787               |  |
| <b>Total</b>                 | <b>4,634,764</b> | <b>1,062</b>                        | <b>0.2291</b>    | <b>497</b>      | <b>0.1072</b>        |  |

Data for Figure 2 in 'Ethnic variation in unexplained deaths in infancy, including sudden infant death syndrome (SIDS), England and Wales 2006-2012: national birth cohort study using routine data'.
